# Supplementary material for: Validation of the SQUASH Physical Activity Questionnaire in a Multi-Ethnic Population: The HELIUS Study
Source: PubMed Central journal article supplement (PMC5004804; doi:10.1371/journal.pone.0161066), 2016-08-30

# S1: Bland Altman Plots for Light Intensity Physical Activity

## Figure A: Men

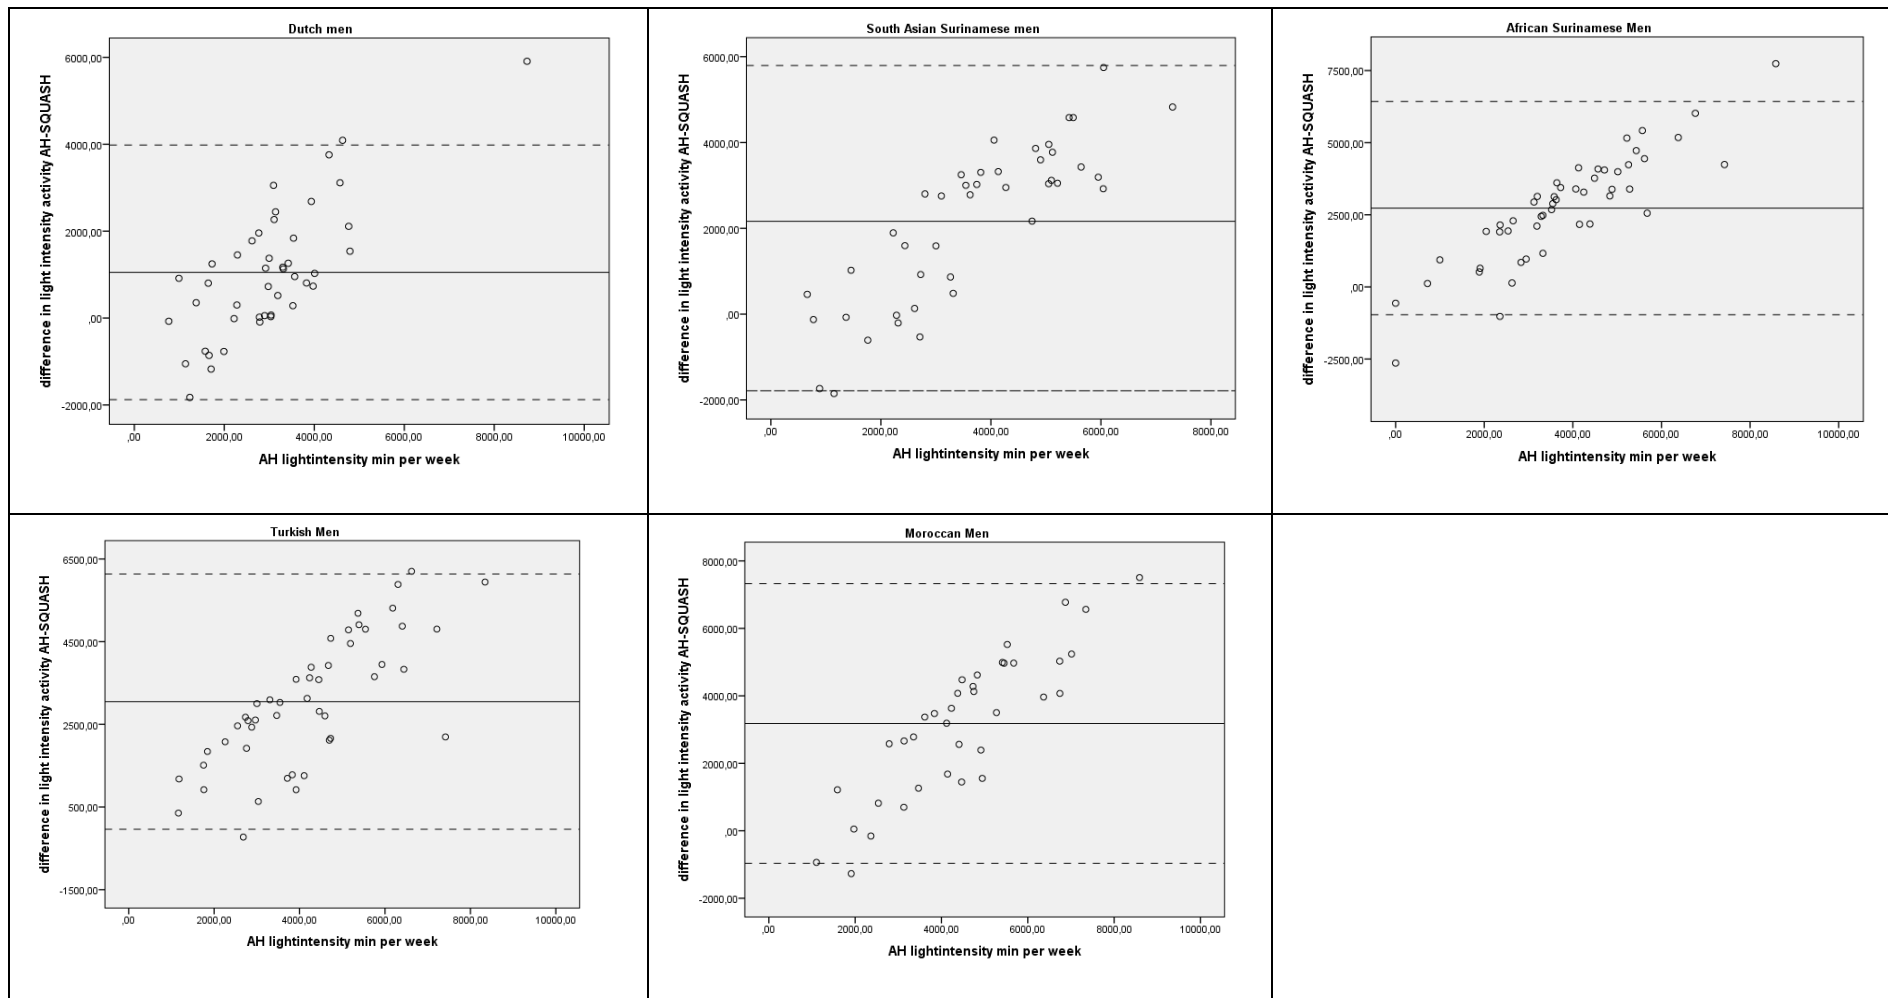

Figure B: Women

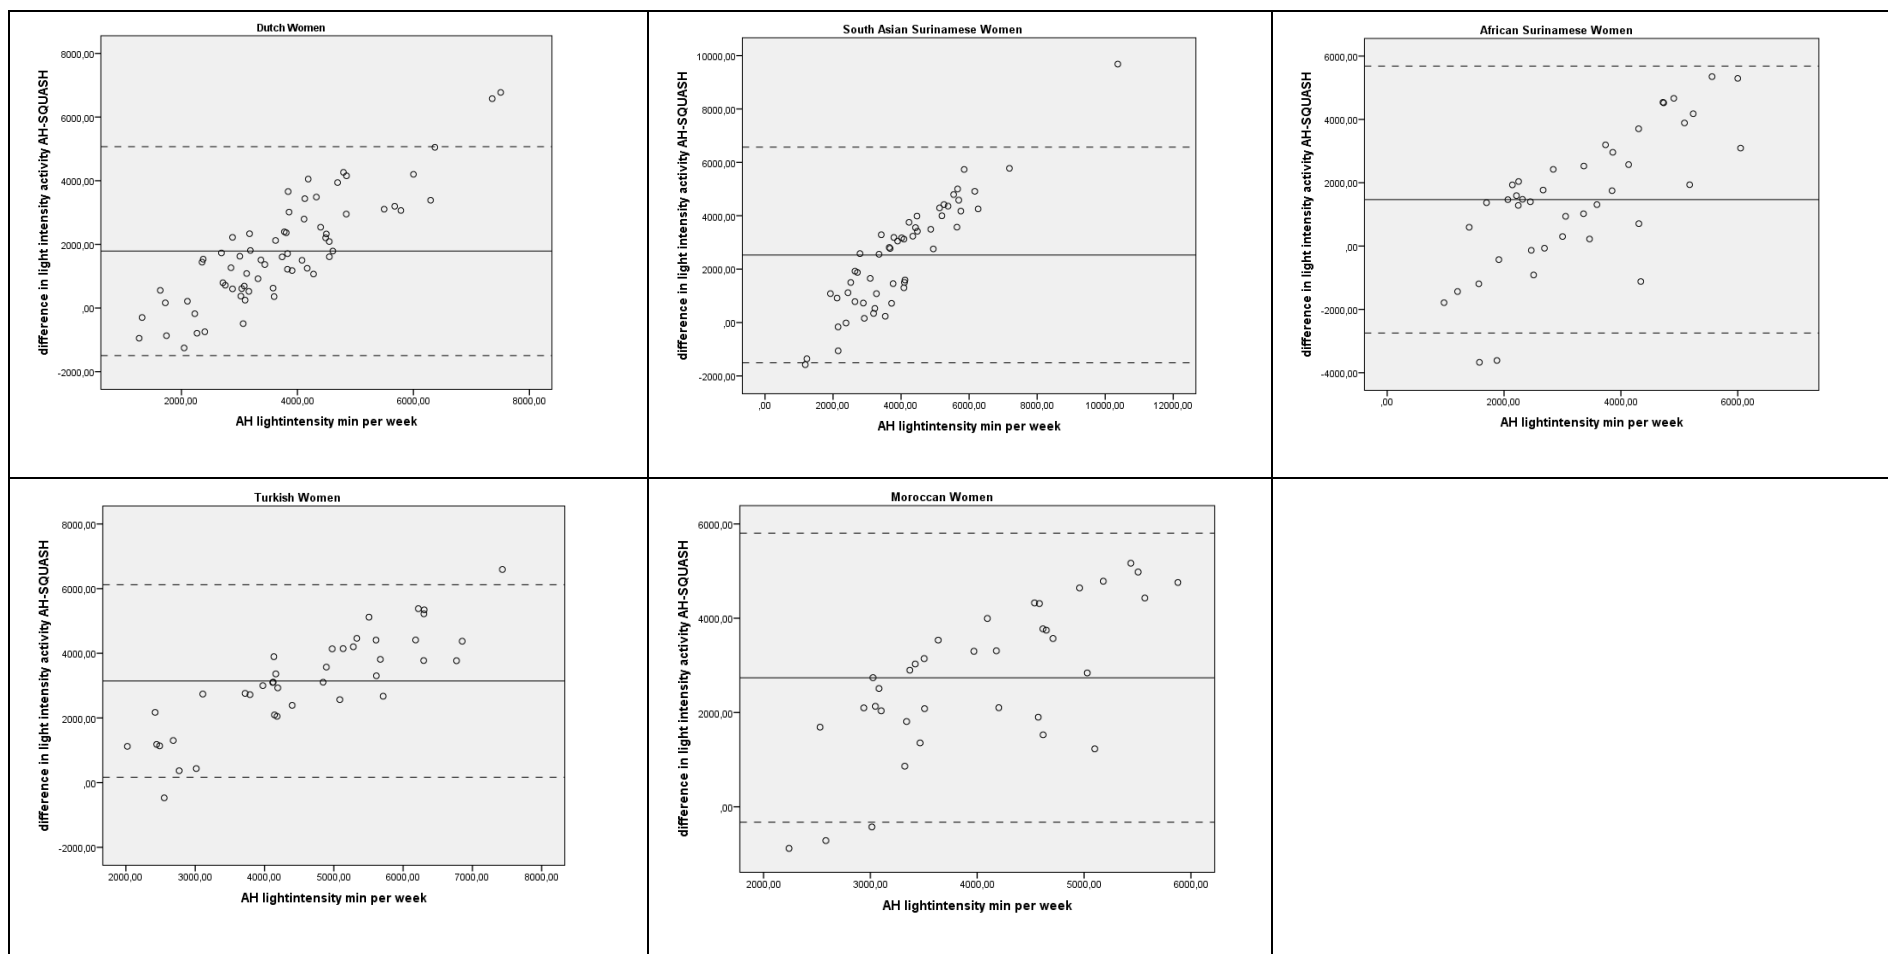

Supplement: pone.0161066.s001.pdf [file pone.0161066.s001.pdf]
